# Supplementary material for: Selective distributions of functionalized single-walled carbon nanotubes in a polymeric reverse hexagonal phase
Source: Royal Society of Chemistry journal article supplement (doi:10.1039/c5sm00355e), 2015-01-01
Supplement: c5sm00355e1.pdf [file c5sm00355e1.pdf]

## **Supplementary Information**

### **Selective Distributions of Functionalized Single-Walled Carbon Nanotubes in a Polymeric Reverse Hexagonal Phase**

Jae-Min Ha, Hyung-Sik Jang, Sung-Hwan Lim, and Sung-Min Choi \*

Department of Nuclear and Quantum Engineering, Korea Advanced Institute of Science and  
Technology, Daejeon, 305-701, Republic of Korea

\*To whom correspondence should be addressed; E-mail: [sungmin@kaist.ac.kr](mailto:sungmin@kaist.ac.kr).

### **Estimation of the polar and apolar domain sizes of L121/water and p-SWNT/L121/water at the lamellar and reverse hexagonal phases**

The detailed structural dimensions of L121/water (61/39) at the lamellar and hexagonal phases were estimated from the measured lattice parameters, composition of the sample and mass densities of components. The volume fractions of polar (PEO + water,  $\phi_{\text{polar}} = 0.43$ ) and apolar (PPO,  $\phi_{\text{apolar}} = 1 - \phi_{\text{polar}} = 0.57$ ) domains in the L121/D<sub>2</sub>O (61/39 by weight, D<sub>2</sub>O was used in the SAXS measurements as well) sample were estimated from the mass densities of D<sub>2</sub>O (1.10 g/ml) and L121 (1.01 g/mL), and the volume ratio (9:1) of PPO and PEO in a L121 molecule (which was determined from the known monomer volumes of PPO (95.4 Å<sup>3</sup>) and PEO (72.4 Å<sup>3</sup>) [S.H. Chen et al, Colloids Surf. A, 2001, **183-185**, 95] and the number of units in L121). In the lamellar phase, the thickness of polar (5.9 nm =  $\phi_{\text{polar}} \times d_{\text{lam}}$ ) and apolar (7.6 nm =  $\phi_{\text{apolar}} \times d_{\text{lam}}$ ) domains were calculated using the measured repeat distance ( $d_{\text{lam}} = 13.5$  nm). In the reverse hexagonal phase, the diameter of the cylindrical polar core (7.4 nm =  $a_{\text{rev-hex}}[\phi_{\text{polar}}\sqrt{3/2\pi}]^{0.5}$ ) was calculated using the measured center-to-center distance between the nearest inverted cylindrical micelles ( $a_{\text{rev-hex}} = 21.4$  nm). The polar and apolar domain sizes in the p-SWNT/L121/D<sub>2</sub>O (3.9/61/39) were estimated in the same way with all p-SWNTs included in the polar domain. The mass density of p-SWNTs is 1.06 g/ml.

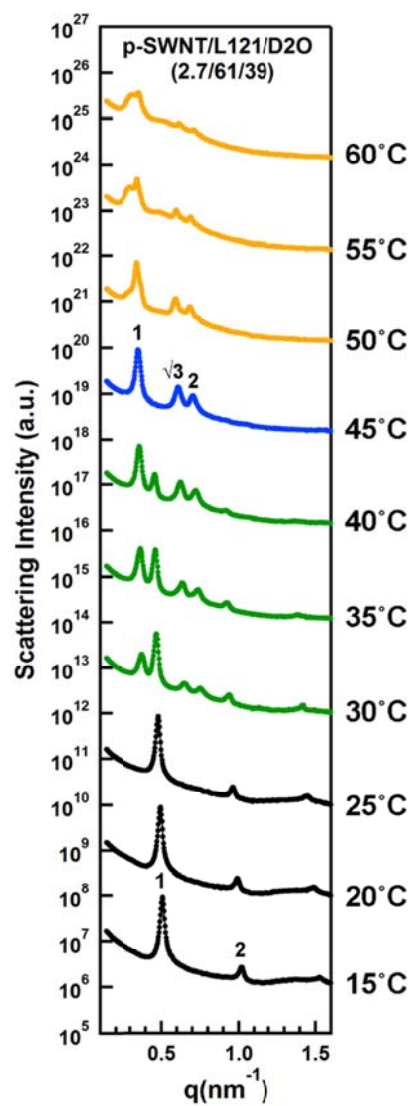

**Fig S1.** SAXS intensities of *p*-SWNT/L121/water (2.7/61/39) upon increasing temperature. The scattering intensities are vertically shifted for visual clarity.

**Table S1.** SAXS peak positions of L121/water (61/39) at different temperatures. The unit of peak position is  $\text{nm}^{-1}$ . The peak position ratios are given in parentheses.

| Temperature<br>(main phase)          | 1st peak     | 2nd peak                | 3rd peak                | 4th peak                | 5th peak                       | 6th peak     |
|--------------------------------------|--------------|-------------------------|-------------------------|-------------------------|--------------------------------|--------------|
| 15°C<br>(Lamellar)                   | 0.467<br>(1) | 0.934<br>(2)            | 1.404<br>(3)            |                         |                                |              |
| 20°C<br>(Lamellar +<br>Reverse hex)  | 0.331<br>(1) | 0.464<br>(1)            | 0.573<br>( $\sqrt{3}$ ) | 0.661<br>(2)            | 0.928<br>(2)                   | 1.395<br>(3) |
| 25°C<br>(Lamellar +<br>Reverse hex)  | 0.342<br>(1) | 0.464<br>(1)            | 0.593<br>( $\sqrt{3}$ ) | 0.684<br>(2)            | 0.928<br>(2)                   | 1.394<br>(3) |
| 30°C<br>(Lamellar +<br>Reverse hex)  | 0.347<br>(1) | 0.461<br>(1)            | 0.601<br>( $\sqrt{3}$ ) | 0.694<br>(2)            | 0.920<br>(2)<br>( $\sqrt{7}$ ) | 1.038<br>(3) |
| 35°C<br>(Reverse hex)                | 0.338<br>(1) | 0.586<br>( $\sqrt{3}$ ) | 0.678<br>(2)            | 0.892<br>( $\sqrt{7}$ ) | 1.018<br>(3)                   |              |
| 40°C<br>(Reverse hex +<br>Isotropic) | 0.278<br>-   | 0.326<br>(1)            | 0.565<br>( $\sqrt{3}$ ) | 0.653<br>(2)            | 0.860<br>( $\sqrt{7}$ )        | 0.980<br>(3) |

\* (-) comes from the transition peak which is under appearing or disappearing.

**Table S2.** SAXS peak positions of *p*-SWNT/L121/water (2/61/39) at different temperatures. The unit of peak position is nm<sup>-1</sup>. The peak position ratios are given in parentheses.

| Temperature<br>(main phase)          | 1st peak     | 2nd peak                | 3rd peak                | 4th peak                | 5th peak     | 6th peak     |
|--------------------------------------|--------------|-------------------------|-------------------------|-------------------------|--------------|--------------|
| 15°C<br>(Lamellar)                   | 0.502<br>(1) | 1.003<br>(2)            | 1.510<br>(3)            |                         |              |              |
| 20°C<br>(Lamellar)                   | 0.488<br>(1) | 0.975<br>(2)            | 1.462<br>(3)            |                         |              |              |
| 25°C<br>(Lamellar +<br>Reverse hex)  | 0.346<br>(-) | 0.474<br>(1)            | 0.948<br>(2)            | 1.429<br>(3)            |              |              |
| 30°C<br>(Lamellar +<br>Reverse hex)  | 0.364<br>(1) | 0.466<br>(1)            | 0.632<br>( $\sqrt{3}$ ) | 0.738<br>(2)            | 0.930<br>(2) | 1.402<br>(3) |
| 35°C<br>(Lamellar +<br>Reverse hex)  | 0.360<br>(1) | 0.463<br>(1)            | 0.624<br>( $\sqrt{3}$ ) | 0.725<br>(2)            | 0.919<br>(2) | 1.393<br>(3) |
| 40°C<br>(Lamellar +<br>Reverse hex)  | 0.357<br>(1) | 0.457<br>(1)            | 0.624<br>( $\sqrt{3}$ ) | 0.725<br>(2)            | 0.919<br>(2) | 1.393<br>(3) |
| 45°C<br>(Reverse hex)                | 0.347<br>(1) | 0.601<br>( $\sqrt{3}$ ) | 0.695<br>(2)            | 0.913<br>( $\sqrt{7}$ ) | 1.035<br>(3) |              |
| 50°C<br>(Reverse hex +<br>Isotropic) | 0.291<br>(-) | 0.340<br>(1)            | 0.489<br>(-)            | 0.588<br>( $\sqrt{3}$ ) | 0.677<br>(2) |              |
| 55°C<br>(Reverse hex +<br>Isotropic) | 0.297<br>(-) | 0.345<br>(1)            | 0.503<br>(-)            | 0.598<br>( $\sqrt{3}$ ) | 0.699<br>(2) |              |

\* (-) comes from the transition peak which is under appearing or disappearing.

**Table S3.** SAXS peak positions of *p*-SWNT/L121/water (2.7/61/39) at different temperatures.

The unit of peak position is  $\text{nm}^{-1}$ . The peak position ratios are given in parentheses.

| Temperature<br>(main phase)          | 1st peak     | 2nd peak                | 3rd peak                | 4th peak                | 5th peak     | 6th peak     |
|--------------------------------------|--------------|-------------------------|-------------------------|-------------------------|--------------|--------------|
| 15°C<br>(Lamellar)                   | 0.508<br>(1) | 1.015<br>(2)            | 1.443<br>(-)            | 1.527<br>(3)            |              |              |
| 20°C<br>(Lamellar)                   | 0.495<br>(1) | 0.989<br>(2)            | 1.418<br>(-)            | 1.489<br>(3)            |              |              |
| 25°C<br>(Lamellar)                   | 0.480<br>(1) | 0.960<br>(2)            | 1.407<br>(-)            | 1.447<br>(3)            |              |              |
| 30°C<br>(Lamellar +<br>Reverse hex)  | 0.374<br>(1) | 0.468<br>(1)            | 0.649<br>( $\sqrt{3}$ ) | 0.755<br>(2)            | 0.934<br>(2) | 1.419<br>(3) |
| 35°C<br>(Lamellar +<br>Reverse hex)  | 0.365<br>(1) | 0.461<br>(1)            | 0.634<br>( $\sqrt{3}$ ) | 0.737<br>(2)            | 0.914<br>(2) | 1.389<br>(3) |
| 40°C<br>(Lamellar +<br>Reverse hex)  | 0.359<br>(1) | 0.458<br>(1)            | 0.624<br>( $\sqrt{3}$ ) | 0.723<br>(2)            | 0.911<br>(2) |              |
| 45°C<br>(Reverse hex)                | 0.352<br>(1) | 0.610<br>( $\sqrt{3}$ ) | 0.706<br>(2)            | 0.914<br>( $\sqrt{7}$ ) | 1.041<br>(3) |              |
| 50°C<br>(Reverse hex +<br>Isotropic) | 0.285<br>(-) | 0.342<br>(1)            | 0.592<br>( $\sqrt{3}$ ) | 0.686<br>(2)            |              |              |
| 55°C<br>(Reverse hex +<br>Isotropic) | 0.294<br>(-) | 0.344<br>(1)            | 0.598<br>( $\sqrt{3}$ ) | 0.688<br>(2)            |              |              |
| 60°C<br>(Reverse hex +<br>Isotropic) | 0.310<br>(-) | 0.356<br>(1)            | 0.618<br>( $\sqrt{3}$ ) | 0.711<br>(2)            |              |              |

\* (-) comes from the transition peak which is under appearing or disappearing.

**Table S4.** SAXS peak positions of *p*-SWNT/L121/water (3.9/61/39) at different temperatures.

The unit of peak position is nm<sup>-1</sup>. The peak position ratios are given in parentheses.

| Temperature<br>(main phase)          | 1st peak     | 2nd peak                | 3rd peak                | 4th peak     | 5th peak     | 6th peak     |
|--------------------------------------|--------------|-------------------------|-------------------------|--------------|--------------|--------------|
| 15°C<br>(Lamellar)                   | 0.517<br>(1) | 1.032<br>(2)            | 1.443<br>(-)            | 1.527<br>(3) |              |              |
| 20°C<br>(Lamellar)                   | 0.504<br>(1) | 1.007<br>(2)            | 1.429<br>(-)            | 1.521<br>(3) |              |              |
| 25°C<br>(Lamellar)                   | 0.489<br>(1) | 0.976<br>(2)            | 1.412<br>(-)            | 1.478<br>(3) |              |              |
| 30°C<br>(Lamellar +<br>Reverse hex)  | 0.368<br>(1) | 0.477<br>(1)            | 0.951<br>(2)            | 1.391<br>(-) | 1.438<br>(3) |              |
| 35°C<br>(Lamellar +<br>Reverse hex)  | 0.371<br>(1) | 0.466<br>(1)            | 0.643<br>( $\sqrt{3}$ ) | 0.748<br>(2) | 0.927<br>(2) | 1.376<br>(3) |
| 40°C<br>(Lamellar +<br>Reverse hex)  | 0.362<br>(1) | 0.454<br>(1)            | 0.628<br>( $\sqrt{3}$ ) | 0.728<br>(2) | 0.895<br>(2) | 1.373<br>(3) |
| 45°C<br>(Lamellar +<br>Reverse hex)  | 0.354<br>(1) | 0.449<br>(1)            | 0.615<br>( $\sqrt{3}$ ) | 0.712<br>(2) |              |              |
| 50°C<br>(Reverse hex)                | 0.347<br>(1) | 0.599<br>( $\sqrt{3}$ ) | 0.693<br>(2)            |              |              |              |
| 55°C<br>(Reverse hex +<br>Isotropic) | 0.283<br>(-) | 0.339<br>(1)            | 0.586<br>( $\sqrt{3}$ ) | 0.678<br>(2) |              |              |
| 60°C<br>(Reverse hex +<br>Isotropic) | 0.303<br>(-) | 0.347<br>(1)            | 0.602<br>( $\sqrt{3}$ ) | 0.694<br>(2) |              |              |

\* (-) comes from the transition peak which is under appearing or disappearing.
